# Supplementary material
Source: MDPI journal article supplement (https://www.mdpi.com/2075-4701/12/2/337)
Supplement: s1 [file s1 › metals-1569081-supplementary.pdf]

# Supplementary Materials: Calculation of $T_c$ of superconducting elements with the Roeser-Huber formalism

Michael Rudolf Koblishchka 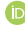 and Anjela Koblishchka-Veneva 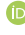

The Supplementary Materials include the drawings of the superconducting paths for each crystal structure (rhombohedral, tetragonal bcc, hcp, fcc\* and dhcp) investigated in the paper. The numbering of the paths corresponds to Tables I and II in the paper.

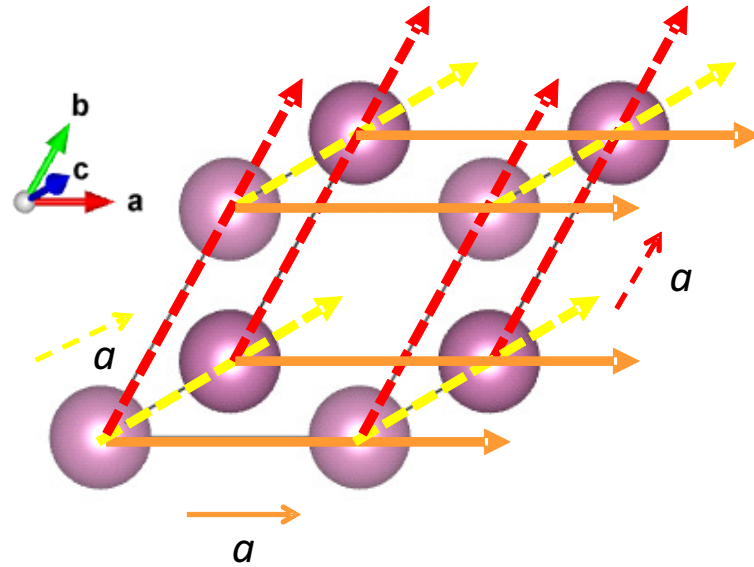

**Figure S1.** The rhombohedral crystal structure of  $\alpha$ -Hg. The details of this crystal structure were already discussed by Roeser et al. [1]. All 3 directions are equal, and the only relevant interatomic distance is given by  $a$ . Each path belongs to two unit cells, so only one superconducting path must be considered in the calculation of  $T_c$ .

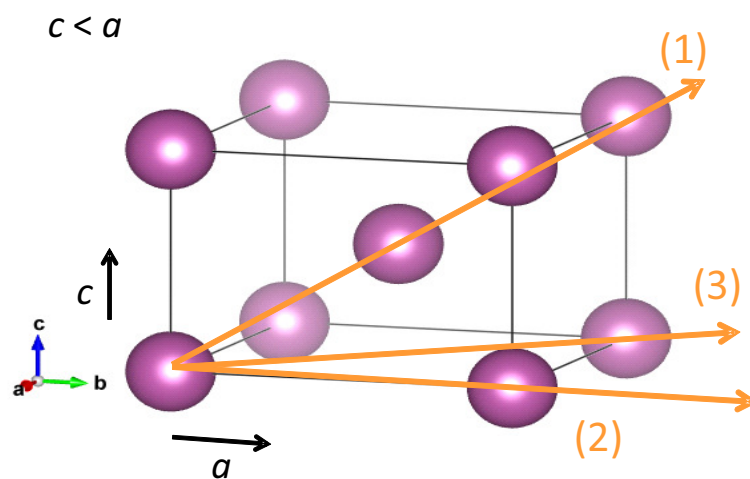

**Figure S2.** The tetragonal bcc structure of  $\beta$ -Hg. The possible superconducting paths are the same as in the regular bcc structure, except that  $c < a$ . The paths fulfilling the symmetry condition are given by the orange vectors (1) – (3).

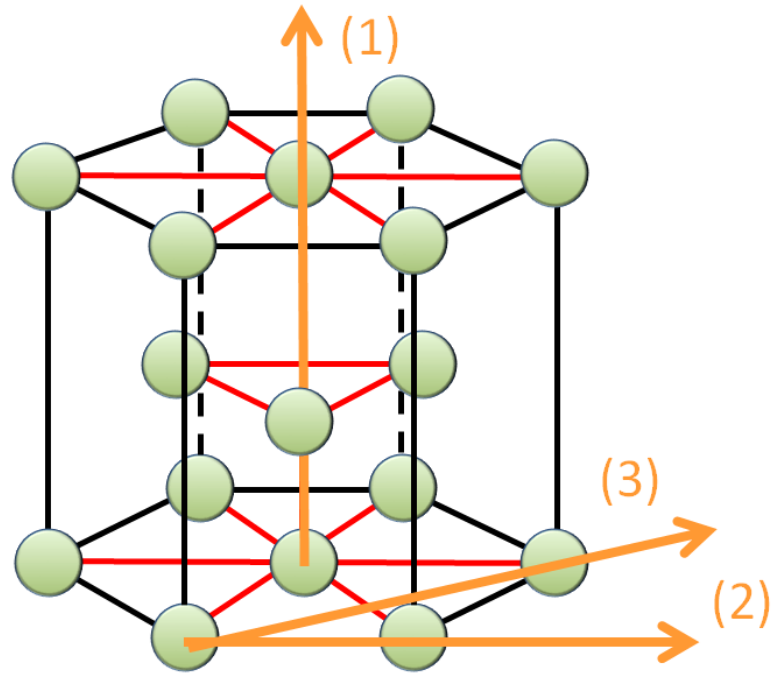

**Figure S3.** The hcp crystal structure, which is the base for the other two structures, fcc\* and dhcp. The superconducting paths fulfilling the symmetry condition are given by the orange vectors (1) – (3).

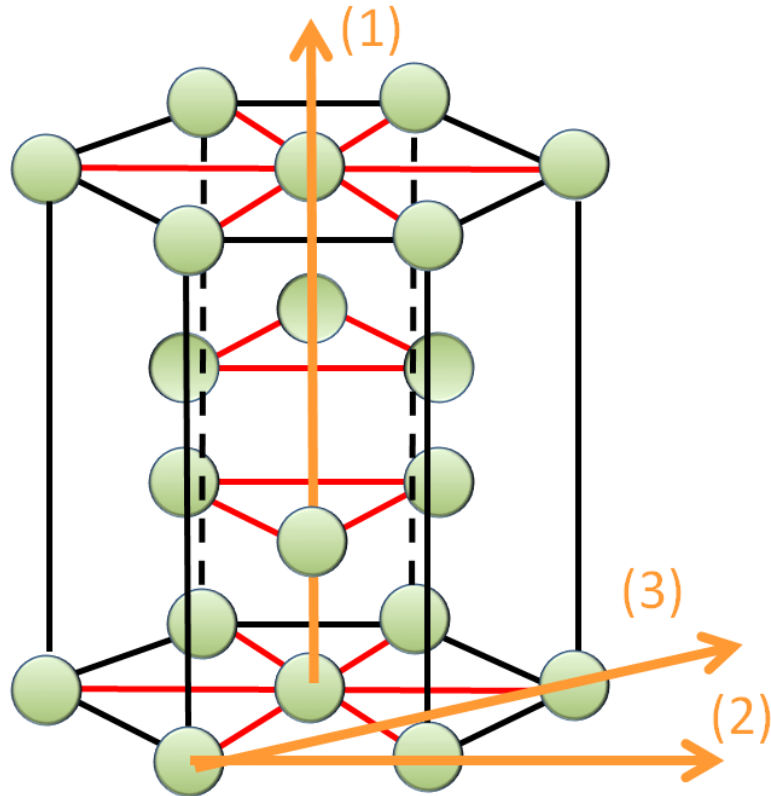

**Figure S4.** The fcc\* crystal structure in [111]-direction (found for La, Ce and Yb [2]), showing one additional inner layer as compared to the hcp structure. The superconducting paths fulfilling the symmetry condition are given by the orange vectors (1) – (3).

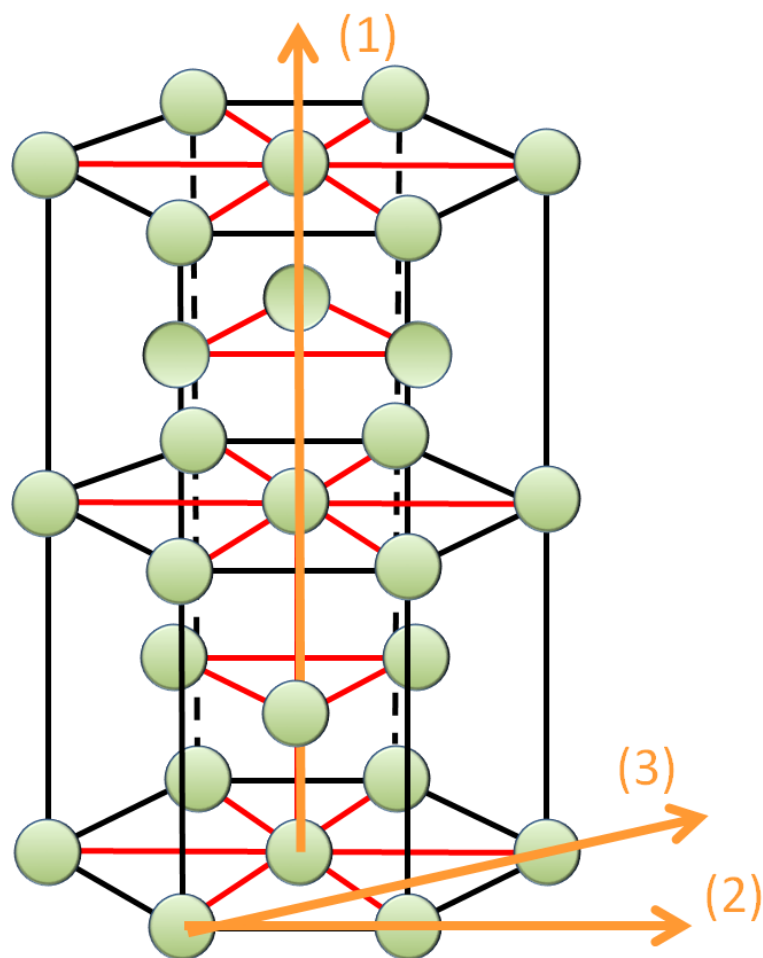

**Figure S5.** The dhcp crystal structure which is unique to the rare earth materials. The superconducting paths (1) – (3) are the same as for the fcc\*-structure, but one must note the different length for  $c$  due to the central atom in the middle plane.

#### References

1. Roeser, H.P.; Haslam, D.T.; Lopez, J.S.; Stepper, M.; von Schoenermark, M.F.; Huber, F.M.; Nikoghosyan, A.S. Correlation between transition temperature and crystal structure of niobium, vanadium, tantalum and mercury superconductors. *Acta Astronaut.* **2010**, *67*, 1333–1336, doi:10.1016/j.actaastro.2010.06.048.
2. Gschneidner, K. A., Jr.; Pecharsky, V. K. Rare-earth elements. *Encyclopedia Britannica*, 17 Jan. 2019, <https://www.britannica.com/science/rare-earth-element/Properties-of-the-metals#/media/1/491579/173111> (accessed on 31. 01. 2022).
